# Supplementary material
Source: publisher site journal article supplement (https://www.dovepress.com/article/578819)
Supplement: Supplementary file 1 [file 578819%20Supplementary%20Material.docx]

**Appendix: EQUTOR Queue Research Guidelines Checklist**

1. Research problem and scheme design

Clarify research questions, inclusion and exclusion criteria, and sample size calculation methods

2. Research subjects and data collection

Detailed description of the research object screening process, data sources, and quality control measures

3. Statistical analysis

Explain the main statistical methods, handling of missing data, and sensitivity analysis

4. Result report

Report research results in accordance with STROBE declaration standards
